# Supplementary material for: Quantitative assessment of HLA-DQ gene polymorphisms with the development of hepatitis B virus infection, clearance, liver cirrhosis, and hepatocellular carcinoma
Source: PubMed Central journal article supplement (PMC5787527; doi:10.18632/oncotarget.22941), 2017-12-05
Supplement: oncotarget-09-96-s001.pdf [file oncotarget-09-96-s001.pdf]

# Quantitative assessment of HLA-DQ gene polymorphisms with the development of hepatitis B virus infection, clearance, liver cirrhosis, and hepatocellular carcinoma

## SUPPLEMENTARY MATERIALS

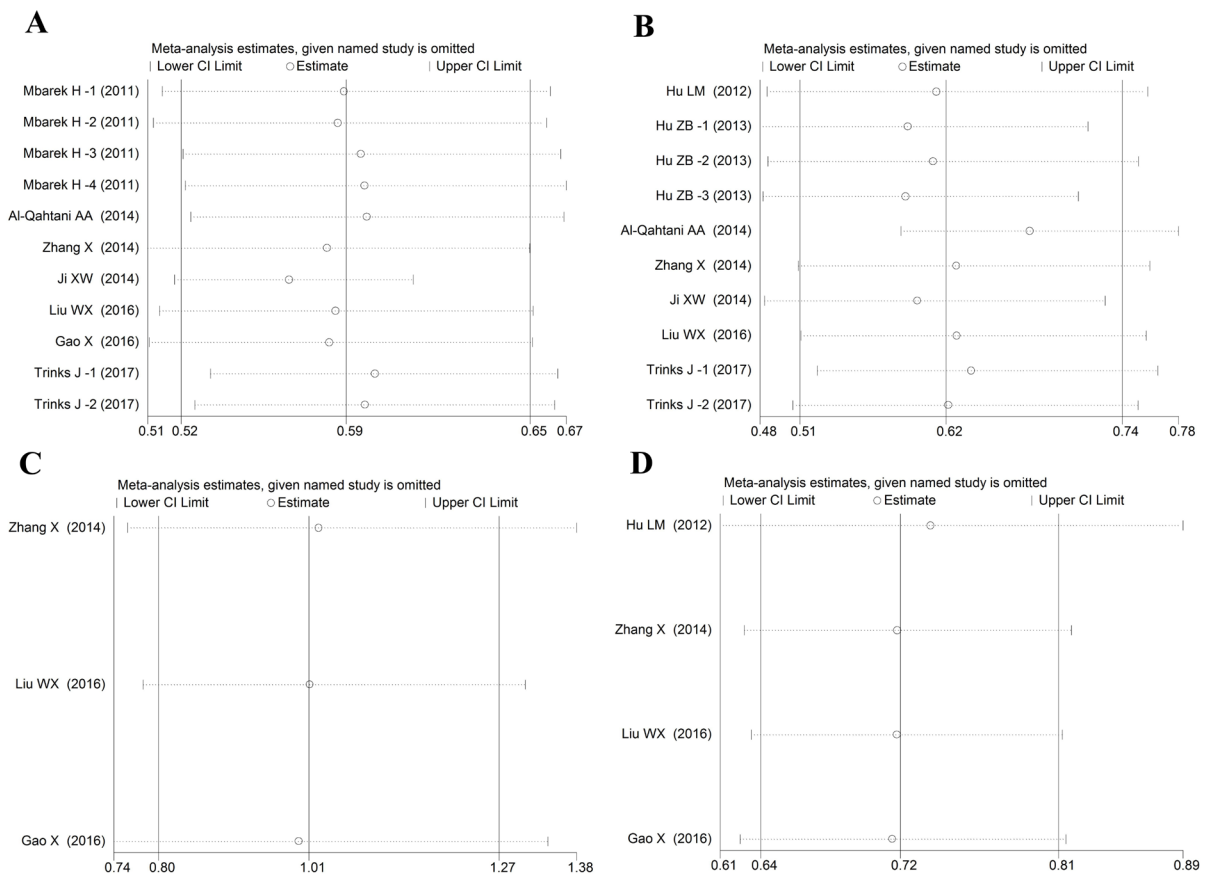

**Supplementary Figure 1: Sensitivity analysis of the pooled ORs and 95% CIs for HLA-DQ rs2856718 polymorphism. A. HBV infection vs. Control (AA vs. AG+GG); B. HBV infection vs. NC (AA vs. AG+GG); C. LC vs. CHB (AA vs. AG+GG); D. HCC vs. LC+CHB (AA vs. AG+GG)**

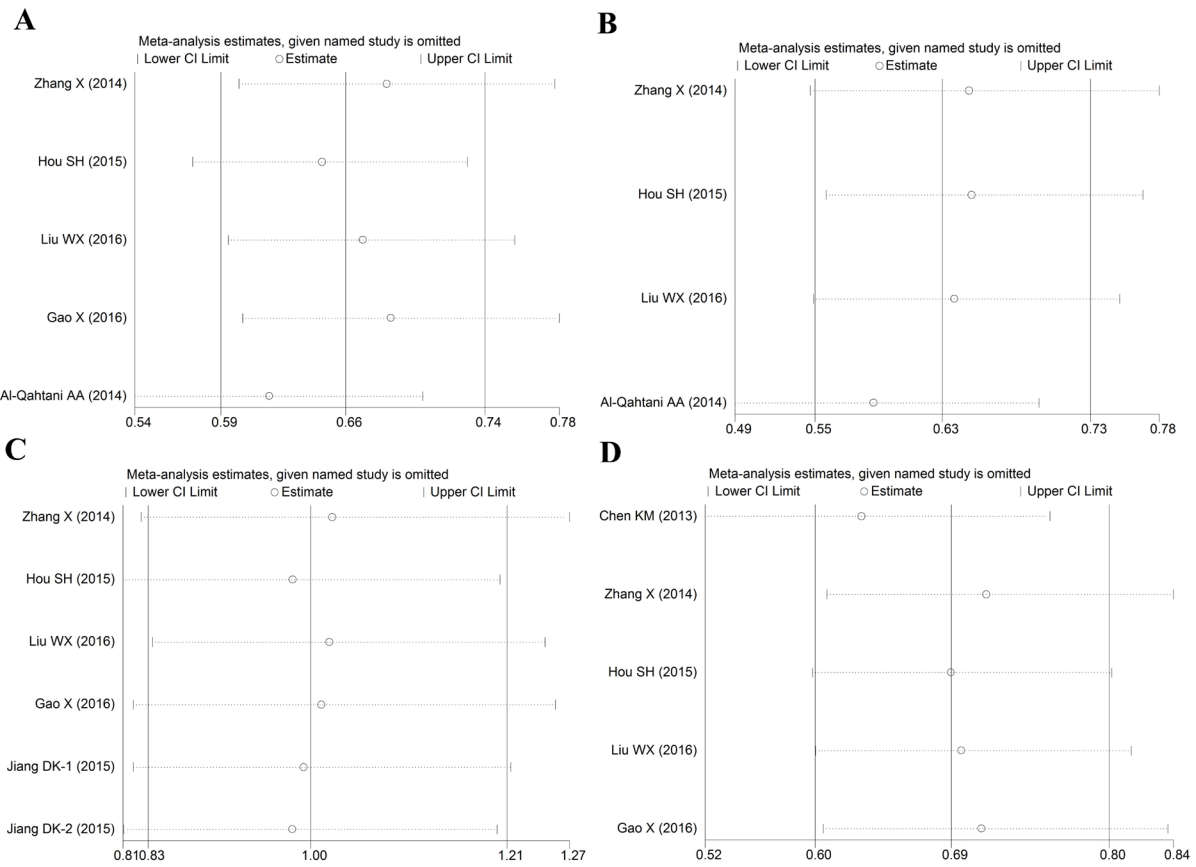

**Supplementary Figure 2: Sensitivity analysis of the pooled ORs and 95% CIs for HLA-DQ rs9275572 polymorphism. A. HBV infection vs. Control (AA vs. AG+GG); B. HBV infection vs. NC (AA vs. AG+GG); C. LC vs. CHB (AA vs. AG+GG); D. HCC vs. LC+CHB (AA vs. AG+GG)**

**A**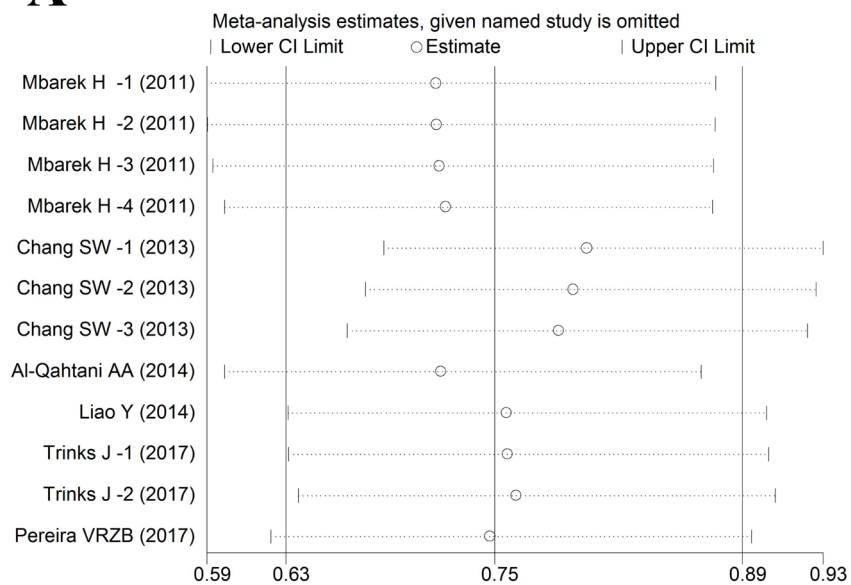**B**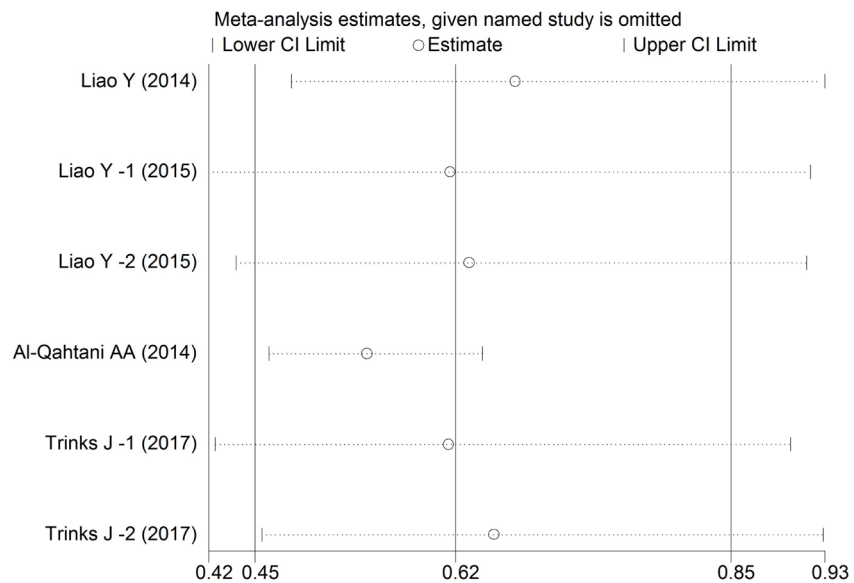

**Supplementary Figure 3: Sensitivity analysis of the pooled ORs and 95% CIs for HLA-DQ rs7453920 polymorphism. A. HBV infection vs. Control (AA vs. AG+GG); B. HBV infection vs. NC (AA vs. AG+GG)**

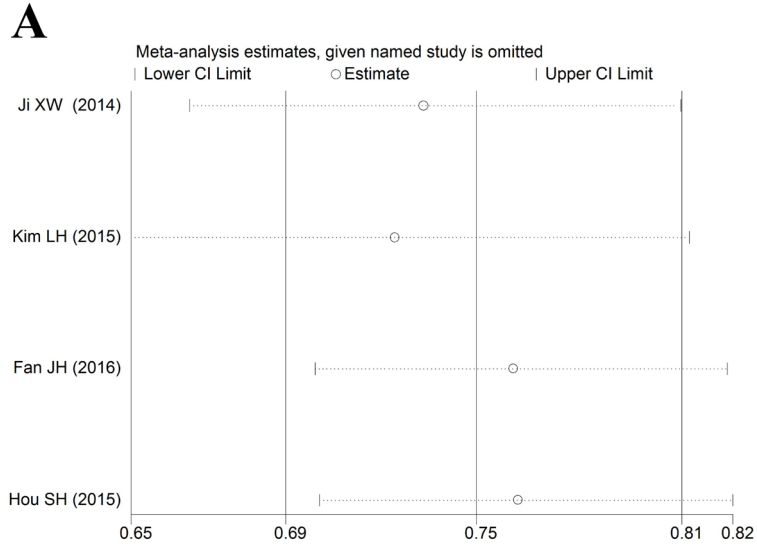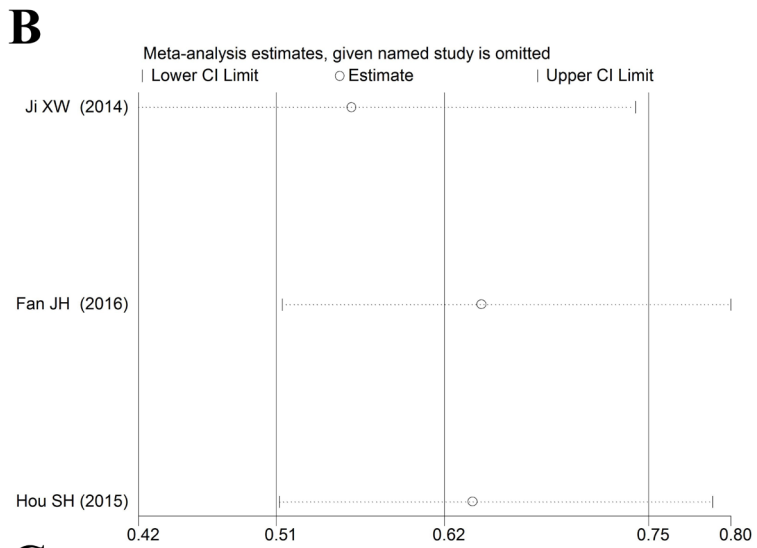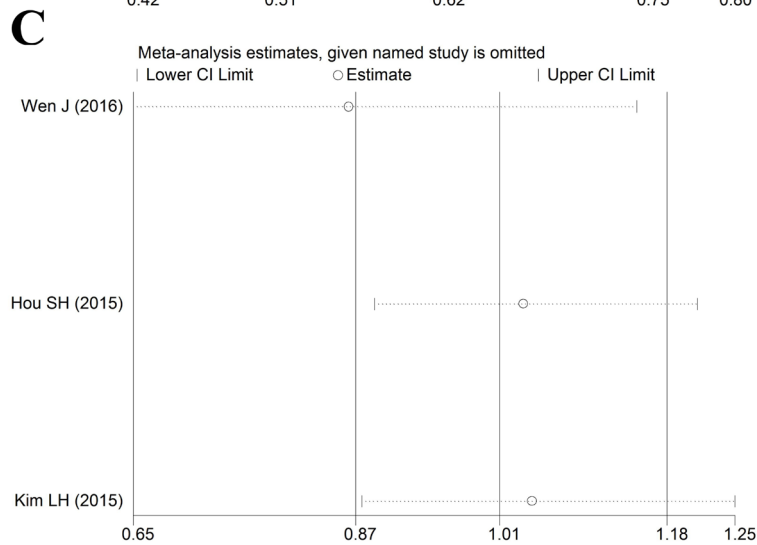

**Supplementary Figure 4: Sensitivity analysis of the pooled ORs and 95% CIs for HLA-DQ rs9275319 polymorphism.**  
 A. HBV infection vs. Control (AA vs. AG+GG); B. HBV infection vs. NC (AA vs. AG+GG); C. HCC vs. LC+CHB (AA vs. AG+GG)

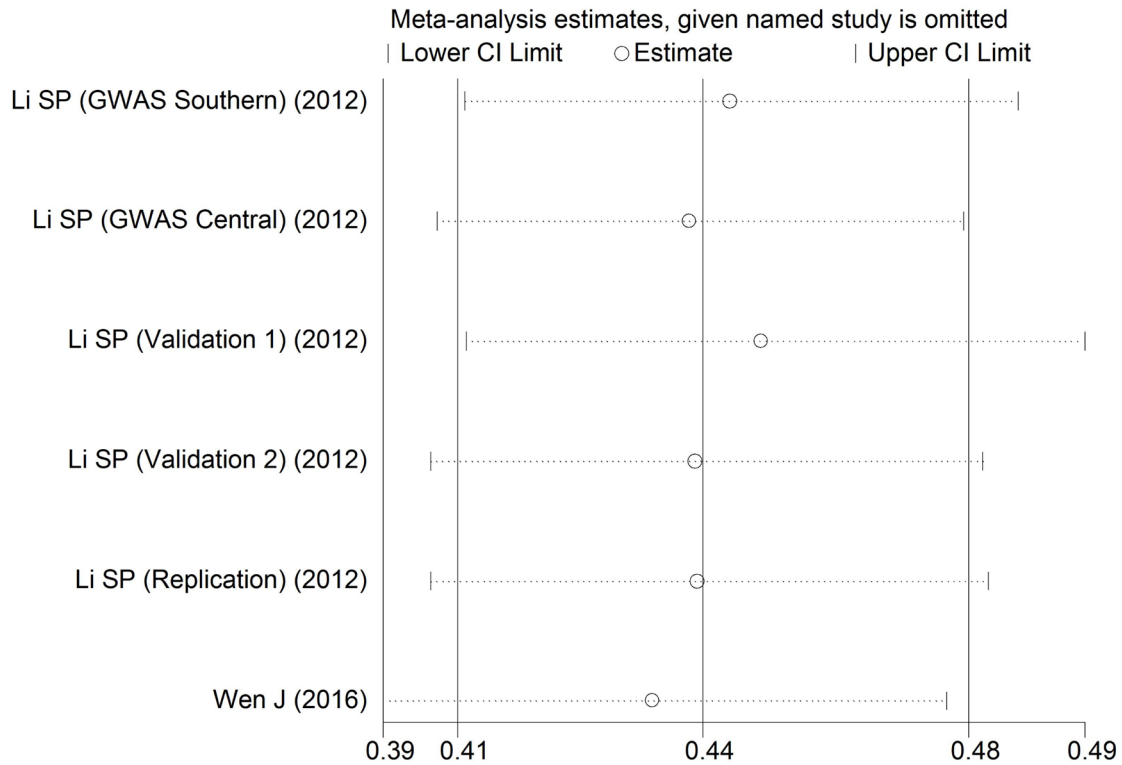

**Supplementary Figure 5: Sensitivity analysis of the pooled ORs and 95% CIs for HLA-DQ rs9272105 polymorphism. HCC vs. LC+CHB (AA vs. AG+GG)**

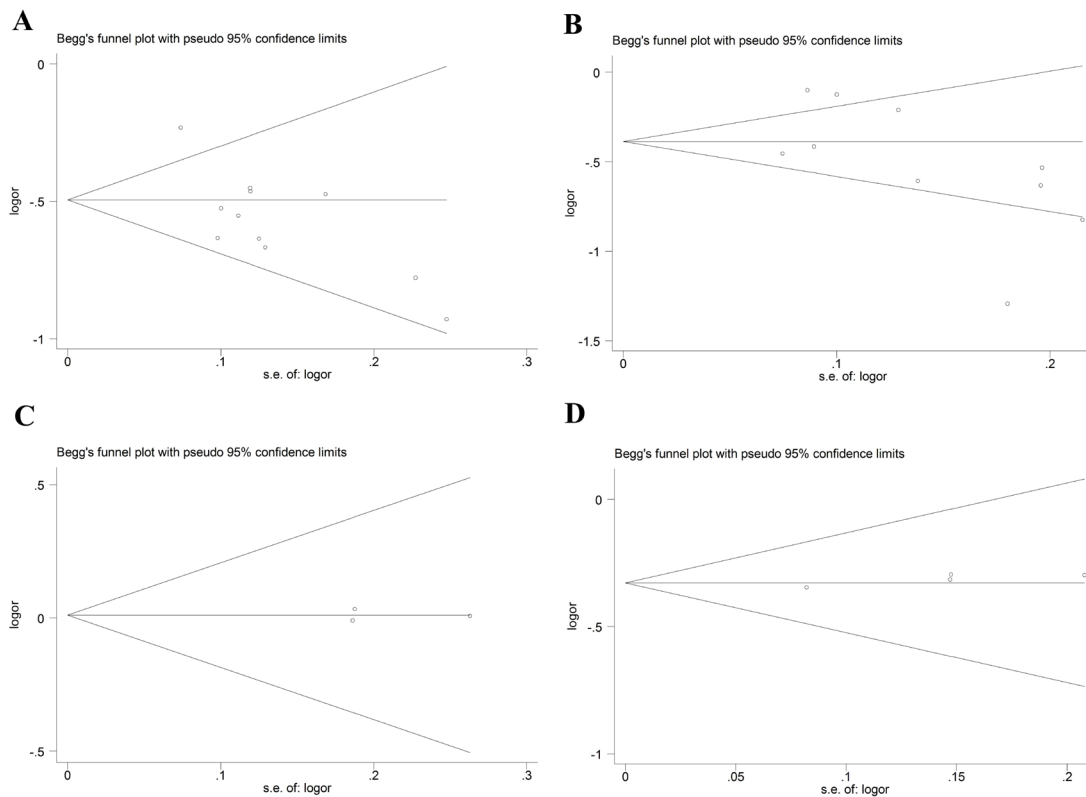

**Supplementary Figure 6: Funnel plot analysis of the association of HLA-DQ rs2856718 polymorphism with HBV infection outcomes. A. HBV infection vs. Control (AA vs. AG+GG); B. HBV infection vs. NC (AA vs. AG+GG); C. LC vs. CHB (AA vs. AG+GG); D. HCC vs. LC+CHB (AA vs. AG+GG)**

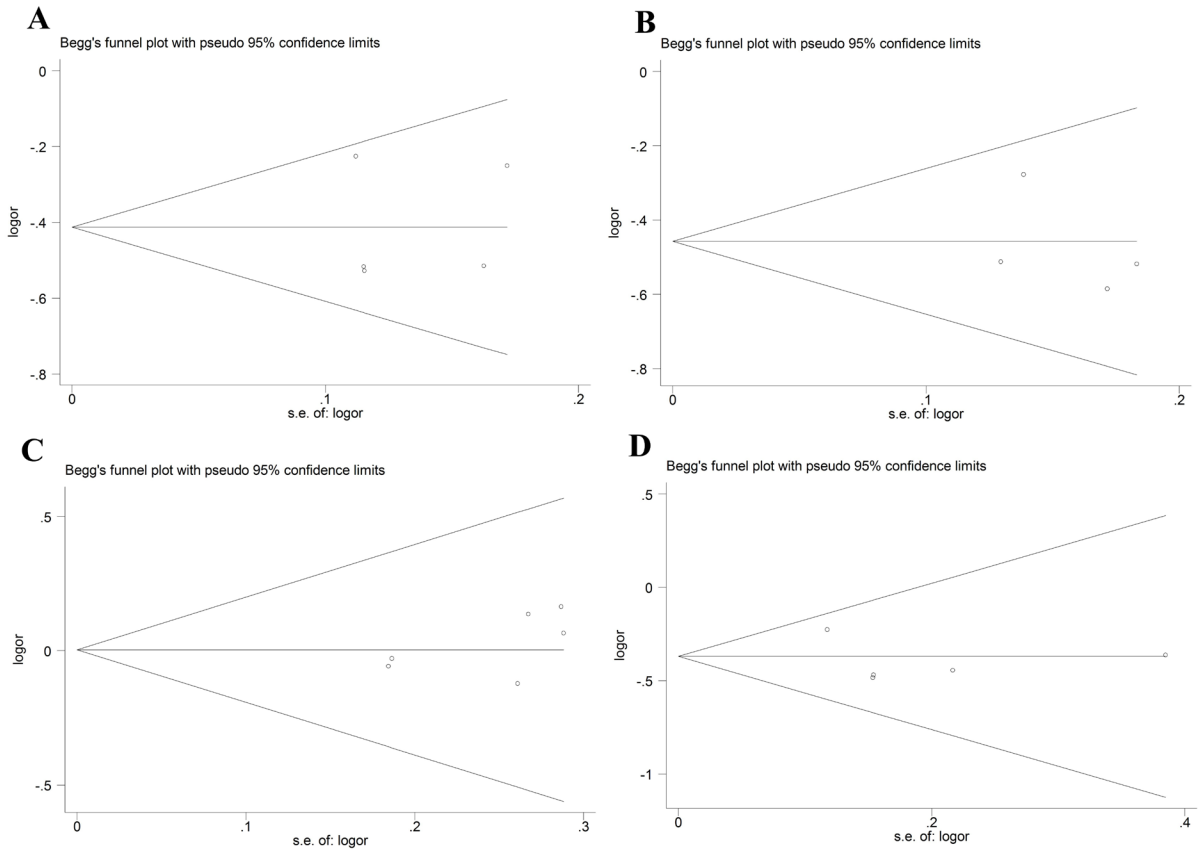

**Supplementary Figure 7: Funnel plot analysis of the association of HLA-DQ rs9275572 polymorphism with HBV infection outcomes. A.** HBV infection vs. Control (AA vs. AG+GG); **B.** HBV infection vs. NC (AA vs. AG+GG); **C.** LC vs. CHB (AA vs. AG+GG); **D.** HCC vs. LC+CHB (AA vs. AG+GG)

**A**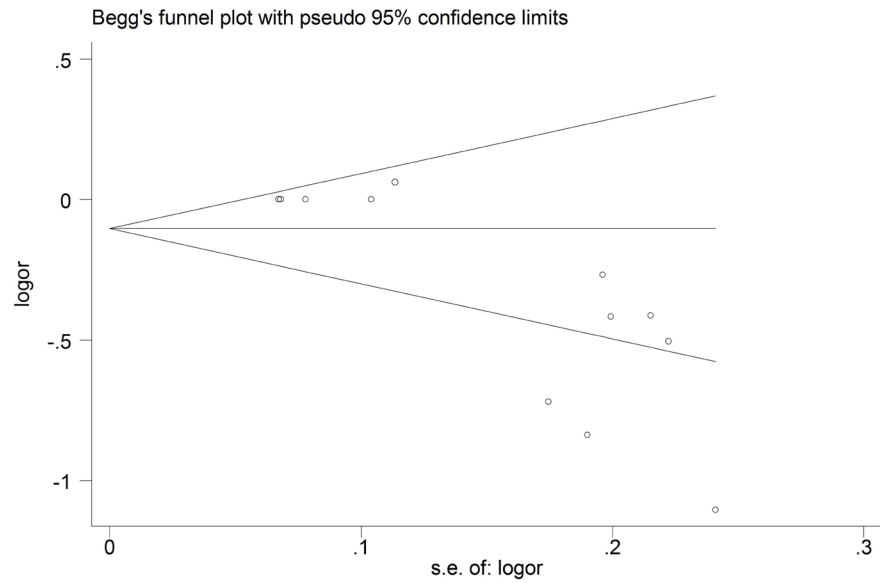**B**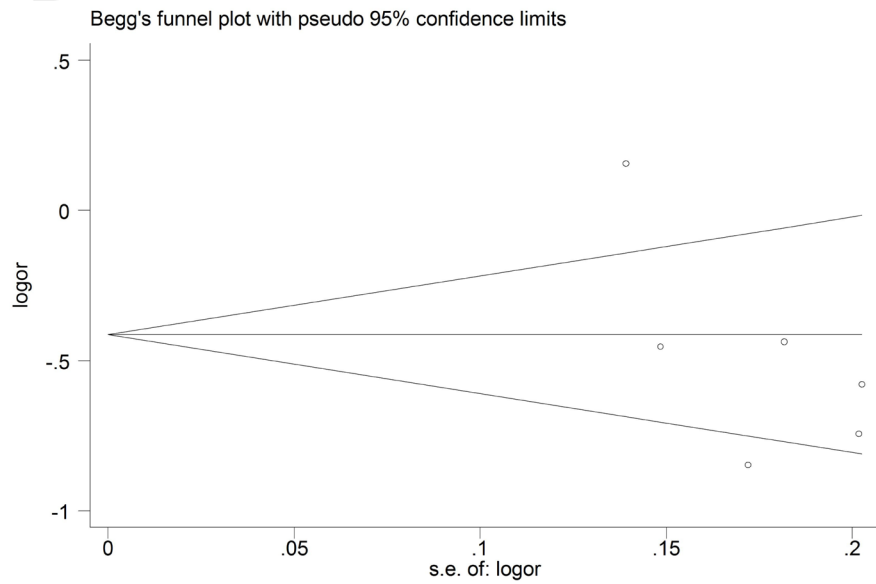

**Supplementary Figure 8: Funnel plot analysis of the association of HLA-DQ rs7453920 polymorphism with HBV infection outcomes. A. HBV infection vs. Control (AA vs. AG+GG); B. HBV infection vs. NC (AA vs. AG+GG)**

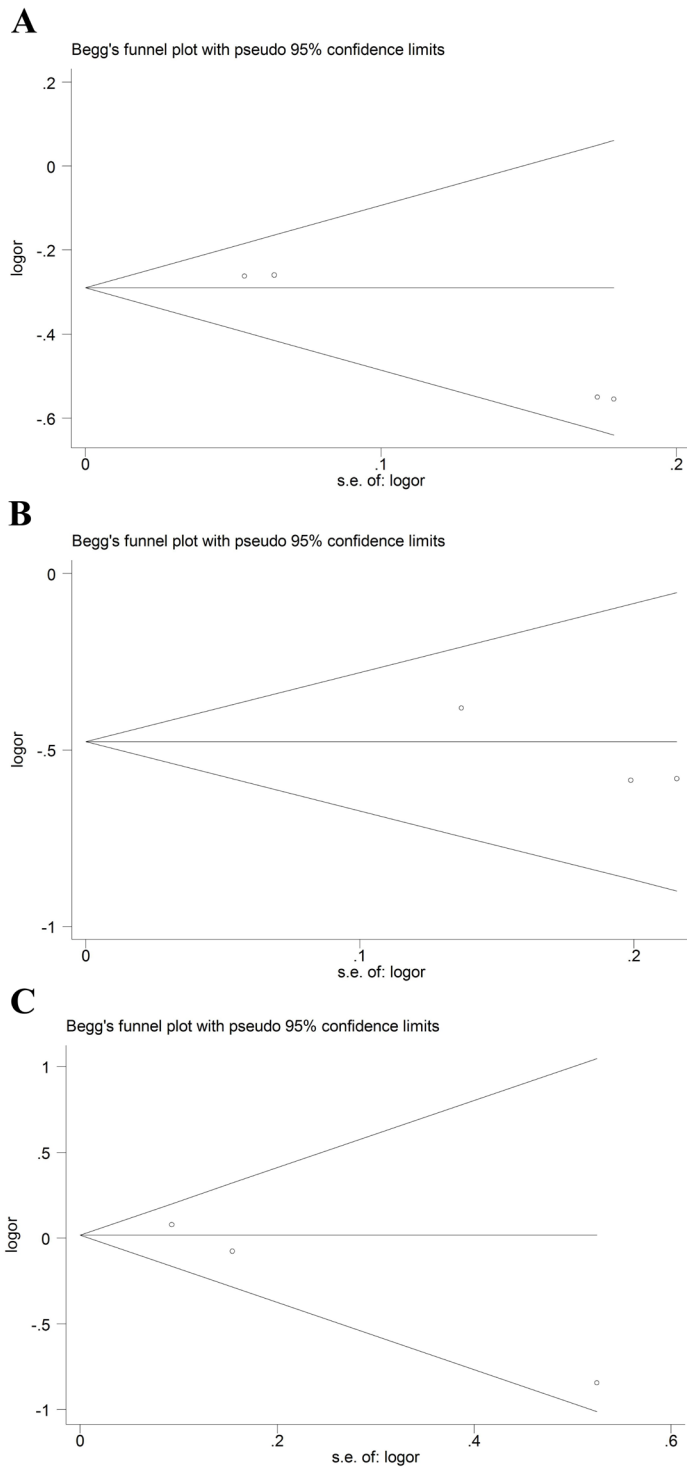

**Supplementary Figure 9: Funnel plot analysis of the association of HLA-DQ rs9275319 polymorphism with HBV infection outcomes. A. HBV infection vs. Control (AA vs. AG+GG); B. HBV infection vs. NC (AA vs. AG+GG); C. HCC vs. LC+CHB (AA vs. AG+GG)**



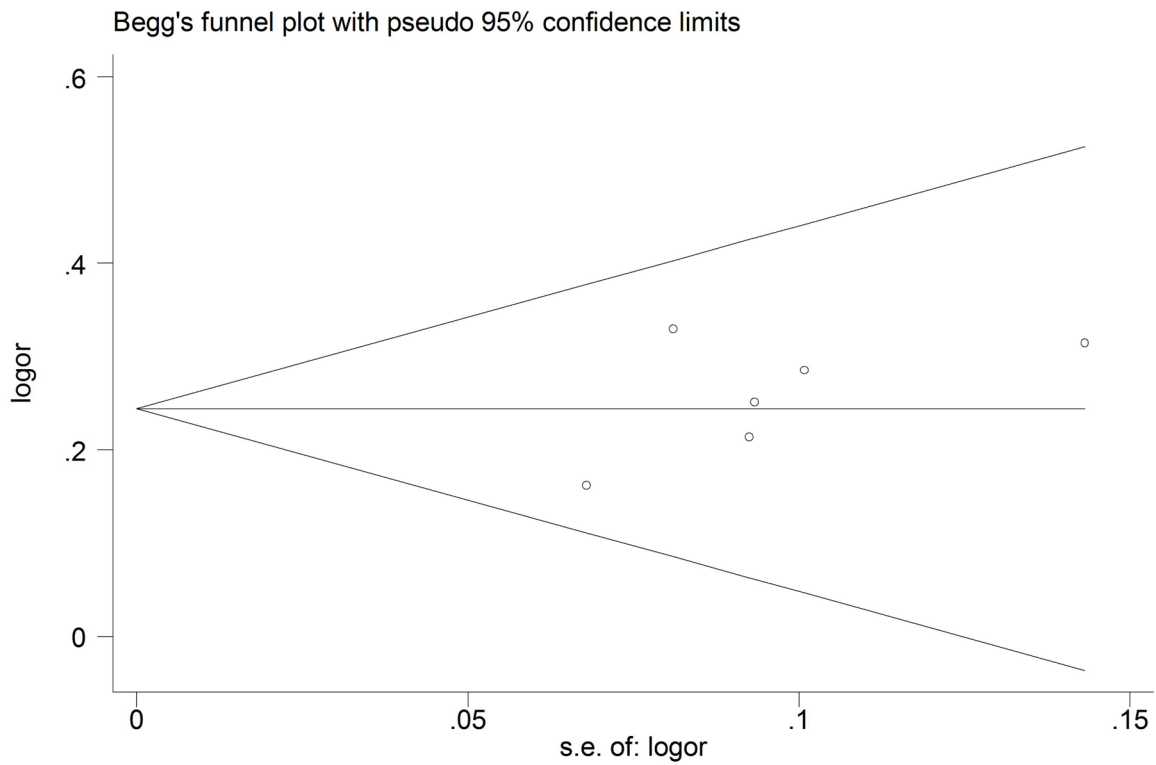

**Supplementary Figure 10: Funnel plot analysis of the association of HLA-DQ rs9272105 polymorphism with HBV infection outcomes. HCC vs. LC+CHB (AA vs. AG+GG)**
